# Supplementary material for: Sustainable development of perovskite solar cells: keeping a balance between toxicity and efficiency
Source: Royal Society of Chemistry journal article supplement (doi:10.1039/d2ta00248e), 2022-01-01
Supplement: d2ta00248e1.pdf [file d2ta00248e1.pdf]

## **Sustainability development of perovskite solar cells: keeping a balance between toxicity and efficiency**

*Guoyu Ding<sup>ab</sup>, Yifan Zheng<sup>\*a</sup>, Xun Xiao<sup>c</sup>, Huiyuan Cheng<sup>ad</sup>, Guodong Zhang<sup>ab</sup>, Yifeng Shi<sup>a</sup>, Yuchuan Shao<sup>\*ab</sup>*

<sup>a</sup>Key Laboratory of Materials for High-Power Laser, Shanghai Institute of Optics and Fine Mechanics, Chinese Academy of Sciences; 201800, Shanghai, China.

<sup>b</sup>Center of Materials Science and Optoelectronics Engineering, University of Chinese Academy of Sciences; 100049, Beijing, China

<sup>c</sup> Department of Applied Physical Sciences, University of North Carolina, Chapel Hill, NC, 27599, USA

<sup>d</sup>Australian Institute for Bioengineering and Nanotechnology, The University of Queensland, St Lucia, Queensland, Australia.

Prof. Y. Zheng, Prof. Y. Shao

Email: yifan.zheng@siom.ac.cn; shaoyuchuan@siom.ac.cn

**Keywords:** Perovskite solar cell, sustainable, toxicity, efficiency, ecosystem

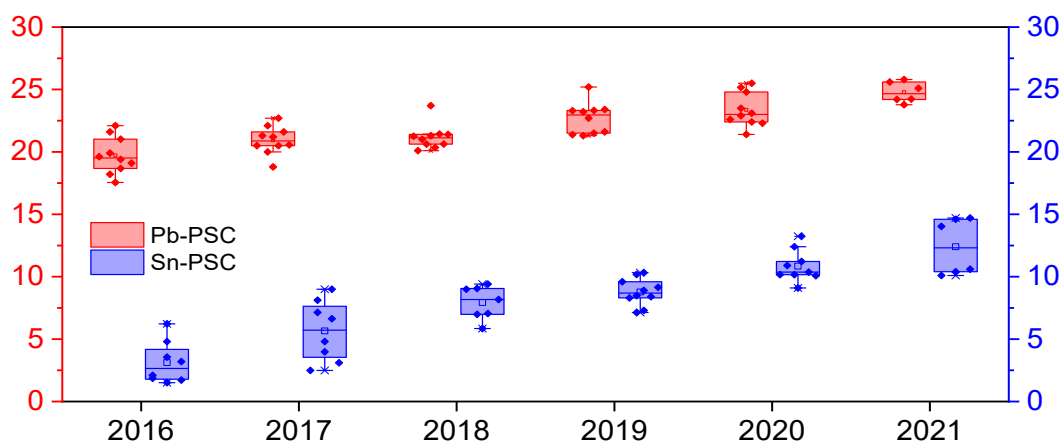

Figure S1 Summary of the state-of-the-art PSC at last six years literatures (Listed as below<sup>1-64</sup>).

Reference list :

1. A. Al-Ashouri, A. Magomedov, M. Roß, M. Jošt, M. Talaikis, G. Chistiakova, T. Bertram, J. A. Márquez, E. Köhnen, E. Kasparavičius, S. Levenco, L. Gil-Escrig, C. J. Hages, R. Schlatmann, B. Rech, T. Malinauskas, T. Unold, C. A. Kaufmann, L. Korte, G. Niaura, V. Getautis and S. Albrecht, *Energy & Environmental Science*, 2019, **12**, 3356-3369.
2. F. Bella, G. Griffini, J.-P. Correa-Baena, G. Saracco, M. Grätzel, A. Hagfeldt, S. Turri and C. Gerbaldi, *Science*, 2016, **354**, 203-206.
3. D. Bi, C. Yi, J. Luo, J.-D. Décoppet, F. Zhang, Shaik M. Zakeeruddin, X. Li, A. Hagfeldt and M. Grätzel, *Nature Energy*, 2016, **1**, 16142.
4. K. T. Cho, S. Paek, G. Grancini, C. Roldán-Carmona, P. Gao, Y. Lee and M. K. Nazeeruddin, *energy and environmental science*, 2017, **10**, 621-627.
5. K. Choi, J. Lee, H. I. Kim, C. W. Park, G.-W. Kim, H. Choi, S. Park, S. A. Park and T. Park, *Energy & Environmental Science*, 2018, **11**, 3238-3247.
6. M. A. Green, E. D. Dunlop, J. Hohl-Ebinger, M. Yoshita, N. Kopidakis and A. W. Y. Ho-Baillie, *Progress in Photovoltaics: Research and Applications*, 2020, **28**, 3-15.
7. Y. Hou, X. Du, S. Scheiner, D. P. McMeekin, Z. Wang, N. Li, M. S. Killian, H. Chen, M. Richter, I. Levchuk, N. Schrenker, E. Spiecker, T. Stubhan, N. A. Luechinger, A. Hirsch, P. Schmuki, H.-P. Steinrück, R. H. Fink, M. Halik, H. J. Snaith and C. J. Brabec, *Science*, 2017, **358**, 1192-1197.
8. J. Huang, S. Xiang, J. Yu and C.-Z. Li, *Energy & Environmental Science*, 2019, **12**, 929-937.
9. M. Jeong, I. W. Choi, E. M. Go, Y. Cho, M. Kim, B. Lee, S. Jeong, Y. Jo, H. W. Choi, J. Lee, J.-H. Bae, S. K. Kwak, D. S. Kim and C. Yang, *Science*, 2020, **369**, 1615-1620.

10. Q. Jiang, L. Zhang, H. Wang, X. Yang, J. Meng, H. Liu, Z. Yin, J. Wu, X. Zhang and J. You, *Nature Energy*, 2016, **2**, 16177.
11. Q. Jiang, Y. Zhao, X. Zhang, X. Yang, Y. Chen, Z. Chu, Q. Ye, X. Li, Z. Yin and J. You, *Nature Photonics*, 2019, **13**, 460-466.
12. E. H. Jung, N. J. Jeon, E. Y. Park, C. S. Moon, T. J. Shin, T.-Y. Yang, J. H. Noh and J. Seo, *Nature*, 2019, **567**, 511-515.
13. H. Lu, Y. Liu, P. Ahlawat, A. Mishra, W. R. Tress, F. T. Eickemeyer, Y. Yang, F. Fu, Z. Wang, C. E. Avalos, B. I. Carlsen, A. Agarwalla, X. Zhang, X. Li, Y. Zhan, S. M. Zakeeruddin, L. Emsley, U. Rothlisberger, L. Zheng, A. Hagfeldt and M. Grätzel, *Science*, 2020, **370**, eabb8985.
14. Y. Shao, Y. Yuan and J. Huang, *Nature Energy*, 2016, **1**, 15001.
15. D.-Y. Son, J.-W. Lee, Y. J. Choi, I.-H. Jang, S. Lee, P. J. Yoo, H. Shin, N. Ahn, M. Choi, D. Kim and N.-G. Park, *Nature Energy*, 2016, **1**, 16081.
16. S.-H. Turren-Cruz, A. Hagfeldt and M. Saliba, *Science*, 2018, **362**, 449-453.
17. S. Wang, B. Yang, J. Han, Z. He, T. Li, Q. Cao, J. Yang, J. Suo, X. Li, Z. Liu, S. Liu, C. Tang and A. Hagfeldt, *Energy & Environmental Science*, 2020, **13**, 5068-5079.
18. Z. Wang, Q. Lin, F. P. Chmiel, N. Sakai, L. M. Herz and H. J. Snaith, *Nature Energy*, 2017, **2**, 17135.
19. Y. Wu, X. Yang, W. Chen, Y. Yue, M. Cai, F. Xie, E. Bi, A. Islam and L. Han, *Nature Energy*, 2016, **1**, 16148.
20. W. S. Yang, B.-W. Park, E. H. Jung, N. J. Jeon, Y. C. Kim, D. U. Lee, S. S. Shin, J. Seo, E. K. Kim, J. H. Noh and S. I. Seok, *Science*, 2017, **356**, 1376-1379.
21. C. Yi, J. Luo, S. Meloni, A. Boziki, N. Ashari-Astani, C. Grätzel, S. M. Zakeeruddin, U. Röthlisberger and M. Grätzel, *Energy & Environmental Science*, 2016, **9**, 656-662.
22. P. You, G. Li, G. Tang, J. Cao and F. Yan, *Energy & Environmental Science*, 2020, **13**, 1187-1196.
23. S. Yue, K. Liu, R. Xu, M. Li, M. Azam, K. Ren, J. Liu, Y. Sun, Z. Wang, D. Cao, X. Yan, S. Qu, Y. Lei and Z. Wang, *Energy & Environmental Science*, 2017, **10**, 2570-2578.
24. B. X. Zhao, C. Yao, K. Gu, T. Liu, Y. Xia and Y.-L. Loo, *Energy & Environmental Science*, 2020, **13**, 4334-4343.
25. J. Zheng, C. F. J. Lau, H. Mehrvarz, F.-J. Ma, Y. Jiang, X. Deng, A. Soeriyadi, J. Kim, M. Zhang, L. Hu, X. Cui, D. S. Lee, J. Bing, Y. Cho, C. Chen, M. A. Green, S. Huang and A. W. Y. Ho-Baillie, *Energy & Environmental Science*, 2018, **11**, 2432-2443.
26. J. Cao, Q. Tai, P. You, G. Tang, T. Wang, N. Wang and F. Yan, *Journal of Materials Chemistry A*, 2019, **7**, 26580-26585.
27. K. Chen, P. Wu, W. Yang, R. Su, D. Luo, X. Yang, Y. Tu, R. Zhu and Q. Gong, *Nano Energy*, 2018, **49**, 411-418.
28. M. Chen, Q. Dong, F. T. Eickemeyer, Y. Liu, Z. Dai, A. D. Carl, B. Bahrami, A. H. Chowdhury, R. L. Grimm, Y. Shi, Q. Qiao, S. M. Zakeeruddin, M. Grätzel and N. P. Padture, *ACS Energy Letters*, 2020, **5**, 2223-2230.
29. T. Fujihara, S. Terakawa, T. Matsushima, C. Qin, M. Yahiro and C. Adachi, *Journal of Materials Chemistry C*, 2017, **5**, 1121-1127.
30. S. Gupta, T. Bendikov, G. Hodes and D. Cahen, *ACS Energy Letters*, 2016, **1**, 1028-1033.
31. H.-Y. Hsu, L. Ji, M. Du, J. Zhao, E. T. Yu and A. J. Bard, *Electrochimica Acta*, 2016, **220**, 205-210.
32. W. Ke, C. C. Stoumpos, I. Spanopoulos, M. Chen, M. R. Wasielewski and M. G. Kanatzidis, *ACS Energy Letters*, 2018, **3**, 1470-1476.
33. W. Ke, C. C. Stoumpos, I. Spanopoulos, L. Mao, M. Chen, M. R. Wasielewski and M. G. Kanatzidis, *Journal of the American Chemical Society*, 2017, **139**, 14800-14806.
34. H. Kim, Y. H. Lee, T. Lyu, J. H. Yoo, T. Park and J. H. Oh, *Journal of Materials Chemistry A*, 2018, **6**, 18173-18182.

35. F. Li, H. Fan, J. Zhang, J.-H. Huang, P. Wang, C. Gao, L.-M. Yang, Z. Zhu, A. K.-Y. Jen, Y. Song and K.-J. Jiang, *Solar RRL*, 2019, **3**, 1900285.
36. F. Li, C. Zhang, J.-H. Huang, H. Fan, H. Wang, P. Wang, C. Zhan, C.-M. Liu, X. Li, L.-M. Yang, Y. Song and K.-J. Jiang, *Angewandte Chemie International Edition*, 2019, **58**, 6688-6692.
37. M. Li, W.-W. Zuo, Y.-G. Yang, M. H. Aldamasy, Q. Wang, S. H. T. Cruz, S.-L. Feng, M. Saliba, Z.-K. Wang and A. Abate, *ACS Energy Letters*, 2020, **5**, 1923-1929.
38. W. Li, J. Li, J. Li, J. Fan, Y. Mai and L. Wang, *Journal of Materials Chemistry A*, 2016, **4**, 17104-17110.
39. X. Liu, T. Wu, J.-Y. Chen, X. Meng, X. He, T. Noda, H. Chen, X. Yang, H. Segawa, Y. Wang and L. Han, *Energy & Environmental Science*, 2020, **13**, 2896-2902.
40. X. Liu, K. Yan, D. Tan, X. Liang, H. Zhang and W. Huang, *ACS Energy Letters*, 2018, **3**, 2701-2707.
41. X. Meng, J. Lin, X. Liu, X. He, Y. Wang, T. Noda, T. Wu, X. Yang and L. Han, *Advanced Materials*, 2019, **31**, 1903721.
42. X. Meng, Y. Wang, J. Lin, X. Liu, X. He, J. Barbaud, T. Wu, T. Noda, X. Yang and L. Han, *Joule*, 2020, **4**, 902-912.
43. X. Meng, T. Wu, X. Liu, X. He, T. Noda, Y. Wang, H. Segawa and L. Han, *The Journal of Physical Chemistry Letters*, 2020, **11**, 2965-2971.
44. K. Nishimura, M. A. Kamarudin, D. Hirotani, K. Hamada, Q. Shen, S. Iikubo, T. Minemoto, K. Yoshino and S. Hayase, *Nano Energy*, 2020, **74**, 104858.
45. C. Ran, J. Xi, W. Gao, F. Yuan, T. Lei, B. Jiao, X. Hou and Z. Wu, *ACS Energy Letters*, 2018, **3**, 713-721.
46. S. Shao, J. Dong, H. Duim, G. H. ten Brink, G. R. Blake, G. Portale and M. A. Loi, *Nano Energy*, 2019, **60**, 810-816.
47. K. Shum and A. Tsatskina, *Nature Energy*, 2016, **1**, 16188.
48. T.-B. Song, T. Yokoyama, S. Aramaki and M. G. Kanatzidis, *ACS Energy Letters*, 2017, **2**, 897-903.
49. C.-M. Tsai, N. Mohanta, C.-Y. Wang, Y.-P. Lin, Y.-W. Yang, C.-L. Wang, C.-H. Hung and E. W.-G. Diau, *Angewandte Chemie International Edition*, 2017, **56**, 13819-13823.
50. J. Xi, Z. Wu, B. Jiao, H. Dong, C. Ran, C. Piao, T. Lei, T.-B. Song, W. Ke, T. Yokoyama, X. Hou and M. G. Kanatzidis, *Advanced Materials*, 2017, **29**, 1606964.
51. T. Yokoyama, D. H. Cao, C. C. Stoumpos, T.-B. Song, Y. Sato, S. Aramaki and M. G. Kanatzidis, *The Journal of Physical Chemistry Letters*, 2016, **7**, 776-782.
52. M. Zhang, M. Lyu, J.-H. Yun, M. Noori, X. Zhou, N. A. Cooling, Q. Wang, H. Yu, P. C. Dastoor and L. Wang, *Nano Research*, 2016, **9**, 1570-1577.
53. G. Yang, Z. Ren, K. Liu, M. Qin, W. Deng, H. Zhang, H. Wang, J. Liang, F. Ye, Q. Liang, H. Yin, Y. Chen, Y. Zhuang, S. Li, B. Gao, J. Wang, T. Shi, X. Wang, X. Lu, H. Wu, J. Hou, D. Lei, S. K. So, Y. Yang, G. Fang and G. Li, *Nature Photonics*, 2021, **15**, 681-689.
54. H. Min, D. Y. Lee, J. Kim, G. Kim, K. S. Lee, J. Kim, M. J. Paik, Y. K. Kim, K. S. Kim, M. G. Kim, T. J. Shin and S. Il Seok, *Nature*, 2021, **598**, 444-450.
55. J. Jeong, M. Kim, J. Seo, H. Lu, P. Ahlawat, A. Mishra, Y. Yang, M. A. Hope, F. T. Eickemeyer, M. Kim, Y. J. Yoon, I. W. Choi, B. P. Darwich, S. J. Choi, Y. Jo, J. H. Lee, B. Walker, S. M. Zakeeruddin, L. Emsley, U. Rothlisberger, A. Hagfeldt, D. S. Kim, M. Grätzel and J. Y. Kim, *Nature*, 2021, **592**, 381-385.
56. W. Chen, S. Liu, Q. Li, Q. Cheng, B. He, Z. Hu, Y. Shen, H. Chen, G. Xu, X. Ou, H. Yang, J. Xi, Y. Li and Y. Li, *Advanced Materials*, **n/a**, 2110482.
57. Y. Zhang, Y. Wang, X. Yang, L. Zhao, R. Su, J. Wu, D. Luo, S. Li, P. Chen, M. Yu, Q. Gong and R. Zhu, *Advanced Materials*, 2022, **34**, 2107420.
58. Z. Shen, Q. Han, X. Luo, Y. Shen, T. Wang, C. Zhang, Y. Wang, H. Chen, X. Yang, Y. Zhang and L. Han, *Energy & Environmental Science*, 2022, DOI: 10.1039/D1EE02897A.

59. X. Jiang, H. Li, Q. Zhou, Q. Wei, M. Wei, L. Jiang, Z. Wang, Z. Peng, F. Wang, Z. Zang, K. Xu, Y. Hou, S. Teale, W. Zhou, R. Si, X. Gao, E. H. Sargent and Z. Ning, *Journal of the American Chemical Society*, 2021, **143**, 10970-10976.
60. B.-B. Yu, Z. Chen, Y. Zhu, Y. Wang, B. Han, G. Chen, X. Zhang, Z. Du and Z. He, *Advanced Materials*, 2021, **33**, 2102055.
61. G. Li, Z. Su, M. Li, F. Yang, M. H. Aldamasy, J. Pascual, F. Yang, H. Liu, W. Zuo, D. Di Girolamo, Z. Iqbal, G. Nasti, A. Dallmann, X. Gao, Z. Wang, M. Saliba and A. Abate, *Advanced Energy Materials*, 2021, **11**, 2101539.
62. X. Liu, T. Wu, X. Luo, H. Wang, M. Furue, T. Bessho, Y. Zhang, J. Nakazaki, H. Segawa and L. Han, *ACS Energy Letters*, 2022, **7**, 425-431.
63. E. Jokar, P.-Y. Cheng, C.-Y. Lin, S. Narra, S. Shahbazi and E. Wei-Guang Diao, *ACS Energy Letters*, 2021, **6**, 485-492.
64. J. Zhou, M. Hao, Y. Zhang, X. Ma, J. Dong, F. Lu, J. Wang, N. Wang and Y. Zhou, *Matter*, 2022, **5**, 683-693.

**Table S1** Workers Hazard via inhalation route

| <b>Workers - Hazard via inhalation route (mg/m<sup>3</sup>)</b> |                           |                                  |                           |                                  |
|-----------------------------------------------------------------|---------------------------|----------------------------------|---------------------------|----------------------------------|
|                                                                 | <b>Systemic effects</b>   |                                  | <b>Local effects</b>      |                                  |
| <b>DNEL</b>                                                     | <b>Long term exposure</b> | <b>Acute/short term exposure</b> | <b>Long term exposure</b> | <b>Acute/short term exposure</b> |
| <b>DMSO</b>                                                     | 484                       |                                  | 265                       |                                  |
| <b>GBL</b>                                                      | 130                       | 958                              | no                        | no                               |
| <b>DMAC</b>                                                     | 23                        | 120                              | no                        | no                               |
| <b>DMPU</b>                                                     | 0.411                     | hazard unknown                   | no                        | no                               |
| <b>PEG</b>                                                      | 40.2                      | no                               | no                        | no                               |
| <b>ACN</b>                                                      | 70                        | 102                              | 70                        | 102                              |
| <b>IPA/Water</b>                                                | 500                       |                                  |                           |                                  |
| <b>2-ME</b>                                                     | 0.31                      | no                               | no                        | no                               |
| <b>Ethanol</b>                                                  | 950                       | no                               | no                        | no                               |
| <b>NMP</b>                                                      | 14.4                      | no                               | 40                        |                                  |
| <b>DMF</b>                                                      | 6                         | no                               | no                        | no                               |

**Table S2** Workers Hazard via dermal route and Workers Hazard for the eyes

| DNEL             | Workers - Hazard via dermal route (mg/kg bw/day) |                           |                                                                   |                           | Workers - Hazard<br>for the eyes |
|------------------|--------------------------------------------------|---------------------------|-------------------------------------------------------------------|---------------------------|----------------------------------|
|                  | Systemic effects                                 |                           | Local effects                                                     |                           | Local effects                    |
|                  | Long term exposure                               | Acute/short term exposure | Long term exposure                                                | Acute/short term exposure |                                  |
| <b>DMSO</b>      | 200                                              |                           | no-threshold effect and/or no dose-response information available |                           |                                  |
| <b>GBL</b>       | 19                                               | no                        | no                                                                | no                        | high hazard                      |
| <b>DMAC</b>      | 11                                               | 42                        | no                                                                | no                        | low hazard                       |
| <b>DMPU</b>      | 0.233                                            | no DNEL required          | no                                                                | no                        | medium hazard                    |
| <b>PEG</b>       | 112                                              | no                        | no                                                                | no                        | no                               |
| <b>ACN</b>       | 20                                               | no                        | no                                                                | no                        | low hazard                       |
| <b>IPA/Water</b> | 888                                              |                           |                                                                   |                           |                                  |
| <b>2-ME</b>      | 0.22                                             | no                        | no                                                                | no                        | no                               |
| <b>Ethanol</b>   | 343                                              | no                        | no                                                                | no                        | medium hazard                    |
| <b>NMP</b>       | 4.8                                              | no                        | medium hazard                                                     | medium hazard             | medium hazard                    |
| <b>DMF</b>       | 1.1                                              | no                        | no                                                                | no                        | low hazard                       |

**Table S3** General Population Hazard via inhalation route

| <b>General Population - Hazard via inhalation route (mg/m<sup>3</sup>)</b> |                           |                                  |                           |                                  |
|----------------------------------------------------------------------------|---------------------------|----------------------------------|---------------------------|----------------------------------|
|                                                                            | <b>Systemic effects</b>   |                                  | <b>Local effects</b>      |                                  |
| <b>DNEL</b>                                                                | <b>Long term exposure</b> | <b>Acute/short term exposure</b> | <b>Long term exposure</b> | <b>Acute/short term exposure</b> |
| <b>DMSO</b>                                                                | 120                       |                                  | 47                        |                                  |
| <b>GBL</b>                                                                 |                           |                                  |                           |                                  |
| <b>DMAC</b>                                                                | no                        | no                               | no                        | no                               |
| <b>DMPU</b>                                                                | 0.072                     | hazard unknown*                  | no                        | no                               |
| <b>PEG</b>                                                                 | 7.14                      | no                               | no                        | no                               |
| <b>ACN</b>                                                                 | 2.4                       | 22                               | no                        | 22                               |
| <b>IPA/Water</b>                                                           | 89                        |                                  |                           |                                  |
| <b>2-ME</b>                                                                | high hazard               | no                               | no                        | no                               |
| <b>Ethanol</b>                                                             | 114                       | no                               | no                        | no                               |
| <b>NMP</b>                                                                 | 3.6                       | no                               | 4.5                       | medium hazard                    |
| <b>DMF</b>                                                                 | 1.1                       | no                               | no                        | no                               |



**Table S4** General Population - Hazard via dermal route

| <b>General Population - Hazard via dermal route (mg/kg bw/day)</b> |                           |                                  |                           |                                  |
|--------------------------------------------------------------------|---------------------------|----------------------------------|---------------------------|----------------------------------|
|                                                                    | <b>Systemic effects</b>   |                                  | <b>Local effects</b>      |                                  |
| <b>DNEL</b>                                                        | <b>Long term exposure</b> | <b>Acute/short term exposure</b> | <b>Long term exposure</b> | <b>Acute/short term exposure</b> |
| <b>DMSO</b>                                                        | 100                       |                                  |                           |                                  |
| <b>GBL</b>                                                         |                           |                                  |                           |                                  |
| <b>DMAC</b>                                                        | no                        | no                               | no                        | no                               |
| <b>DMPU</b>                                                        | 0.083                     | no DNEL required                 | no                        | no                               |
| <b>PEG</b>                                                         | 40                        | no                               | no                        | no                               |
| <b>ACN</b>                                                         | 1.2                       | no                               | no                        | no                               |
| <b>IPA/Water</b>                                                   | 319                       |                                  |                           |                                  |
| <b>2-ME</b>                                                        | high hazard               | no                               | no                        | no                               |
| <b>Ethanol</b>                                                     | 206                       | no                               | no                        | no                               |
| <b>NMP</b>                                                         | 2.4                       | no                               | medium hazard             | medium hazard                    |
| <b>DMF</b>                                                         | low hazard                | no                               | no                        | no                               |

**Table S5** General Population Hazard via oral route and General Population Hazard for the eyes

| DNEL      | General Population - Hazard via oral route<br>(mg/kg bw/day) |                           |                    |                           | General Population -<br>Hazard for the eyes |
|-----------|--------------------------------------------------------------|---------------------------|--------------------|---------------------------|---------------------------------------------|
|           | Systemic effects                                             |                           | Local effects      |                           | Local effects                               |
|           | Long term exposure                                           | Acute/short term exposure | Long term exposure | Acute/short term exposure |                                             |
| DMSO      | 60                                                           |                           |                    |                           |                                             |
| GBL       |                                                              |                           |                    |                           |                                             |
| DMAC      | 2                                                            | no                        |                    |                           | no                                          |
| DMPU      | 0.042                                                        | low hazard                |                    |                           | medium hazard                               |
| PEG       | 40                                                           | no                        | no                 | no                        | no                                          |
| ACN       | 0.4                                                          | 0.6                       |                    |                           | low hazard                                  |
| IPA/Water | 26                                                           |                           |                    |                           |                                             |
| 2-ME      | 0.11                                                         | no                        | no                 | 0.025                     | no                                          |
| Ethanol   | 87                                                           | no                        |                    |                           | no                                          |
| NMP       | 0.85                                                         | no                        |                    |                           | medium hazard                               |
| DMF       | 0.16                                                         | no                        |                    |                           | low hazard                                  |

**Table S6** Eco-toxicological Summary(water)

|                  | Freshwater  |                   | Marine water |                   |
|------------------|-------------|-------------------|--------------|-------------------|
|                  | PNEC (mg/L) | Assessment factor | PNEC         | Assessment factor |
| <b>DMSO</b>      | 17          | 1000              | 1.7          | 10000             |
| <b>GBL</b>       | 0.056       | 1000              | 0.006        | 10000             |
| <b>DMAC</b>      | 0.5         | 1000              | 0.05         | 10000             |
| <b>DMPU</b>      | 0.103       | 1000              | 0.01         | 10000             |
| <b>THF</b>       |             |                   |              |                   |
| <b>PEG</b>       | 273         | 50                | 27.3         | 500               |
| <b>ACN</b>       | 10          | 10                | 1            | 100               |
| <b>IPA/Water</b> | 140.9       | 1                 | 140.9        | 1                 |
| <b>2-ME</b>      | 10          | 50                | 1            | 500               |
| <b>Ethanol</b>   | 0.96        | 10                | 0.79         | 100               |
| <b>NMP</b>       | 0.25        | 50                | 0.025        | 500               |
| <b>DMF</b>       | NO          |                   | NO           |                   |

**Table S7** Eco-toxicological Summary (sediment, soil & secondary poisoning)

|                  | <b>Sediment<br/>(freshwater)</b>    | <b>Sediment<br/>(marine water)</b>  | <b>Soil</b>                     | <b>Secondary<br/>poisoning (pred<br/>ators)</b> |
|------------------|-------------------------------------|-------------------------------------|---------------------------------|-------------------------------------------------|
|                  | <b>PNEC<br/>(mg/kg sediment dw)</b> | <b>PNEC<br/>(mg/kg sediment dw)</b> | <b>PNEC<br/>(mg/kg soil dw)</b> | <b>PNEC<br/>(g/kg food)</b>                     |
| <b>DMSO</b>      | 13.4                                |                                     | 3.02                            | 0.7                                             |
| <b>GBL</b>       | 0.24                                | 0.02                                | 0.015                           | no potential for<br>bioaccumulation             |
| <b>DMAC</b>      | 3.25                                | 0.325                               | 0.356                           | no potential for<br>bioaccumulation             |
| <b>DMPU</b>      | 0.46                                | 0.046                               | 0.032                           | no potential for<br>bioaccumulation             |
| <b>THF</b>       |                                     |                                     |                                 |                                                 |
| <b>PEG</b>       | 1030                                | 103                                 | 46.4                            | no potential for<br>bioaccumulation             |
| <b>ACN</b>       | 40.5                                | 4.05                                | 2.23                            | no potential for<br>bioaccumulation             |
| <b>IPA/Water</b> | 552                                 | 552                                 | 28                              | 160                                             |
| <b>2-ME</b>      | 36.8                                | 3.68                                | 1.87                            | 7.3                                             |
| <b>Ethanol</b>   | 3.6                                 | 2.9                                 | 0.63                            | 0.38                                            |
| <b>NMP</b>       | 1.09                                | 0.109                               | 0.07                            | no potential for<br>bioaccumulation             |
| <b>DMF</b>       | 111                                 | 11.1                                | NO                              | no potential for<br>bioaccumulation             |

**Table S8** Ecological and human toxicity data for MAI, FAI, Csl

|                      | <b>MAI</b> | <b>FAI</b> | <b>Csl</b> | <b>Unit</b>                                |
|----------------------|------------|------------|------------|--------------------------------------------|
| <b>CC</b>            | 3.81       | 2.74       | 2.03       | (kg CO <sub>2</sub> eq )                   |
| <b>CED</b>           | 4.63       | 1.98       | 0.541      | MJ (megajoules )                           |
| <b>HT</b>            | 2.47       | 3.62       | 1.86       | (kg 1,4-DCB eq )                           |
| <b>HT-Cancer</b>     | 3.53       | 3.04       | 3.35       | (*10 <sup>-10</sup> CTU <sub>h</sub> )/mol |
| <b>HT-Non-Cancer</b> | 5.72       | 11.9       | 5.33       | (*10 <sup>-10</sup> CTU <sub>h</sub> )/mol |
| <b>Eco-toxicity</b>  | 19.7       | 39.2       | 20.5       | (CTU <sub>e</sub> )/mol                    |
